# Supplementary material for: In Vitro Transformation of Protopanaxadiol Saponins in Human Intestinal Flora and Its Effect on Intestinal Flora
Source: Hindawi journal article supplement (doi:10.1155/2021/1735803), 2021-10-22
Supplement: f1 [file 1735803.f1.pdf]

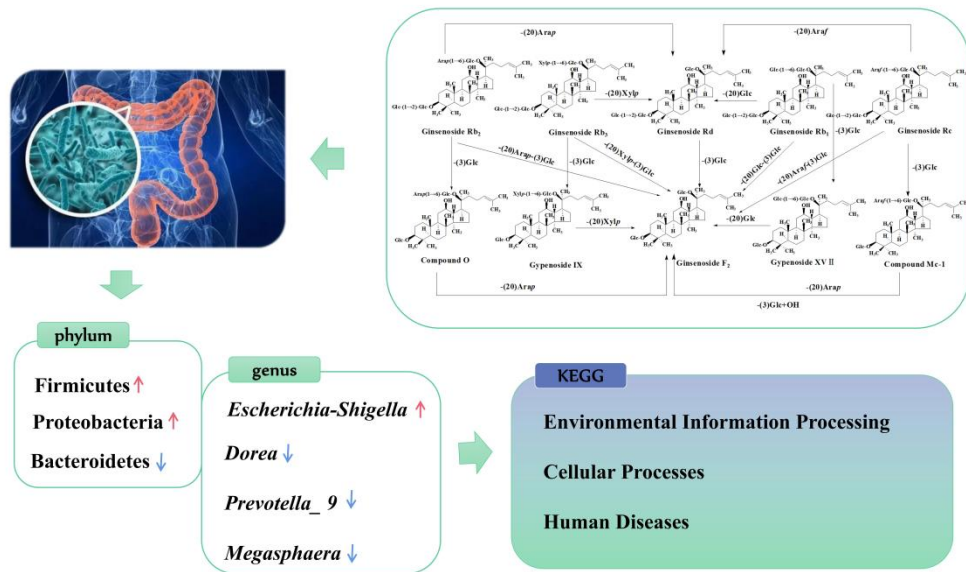

Fig 1

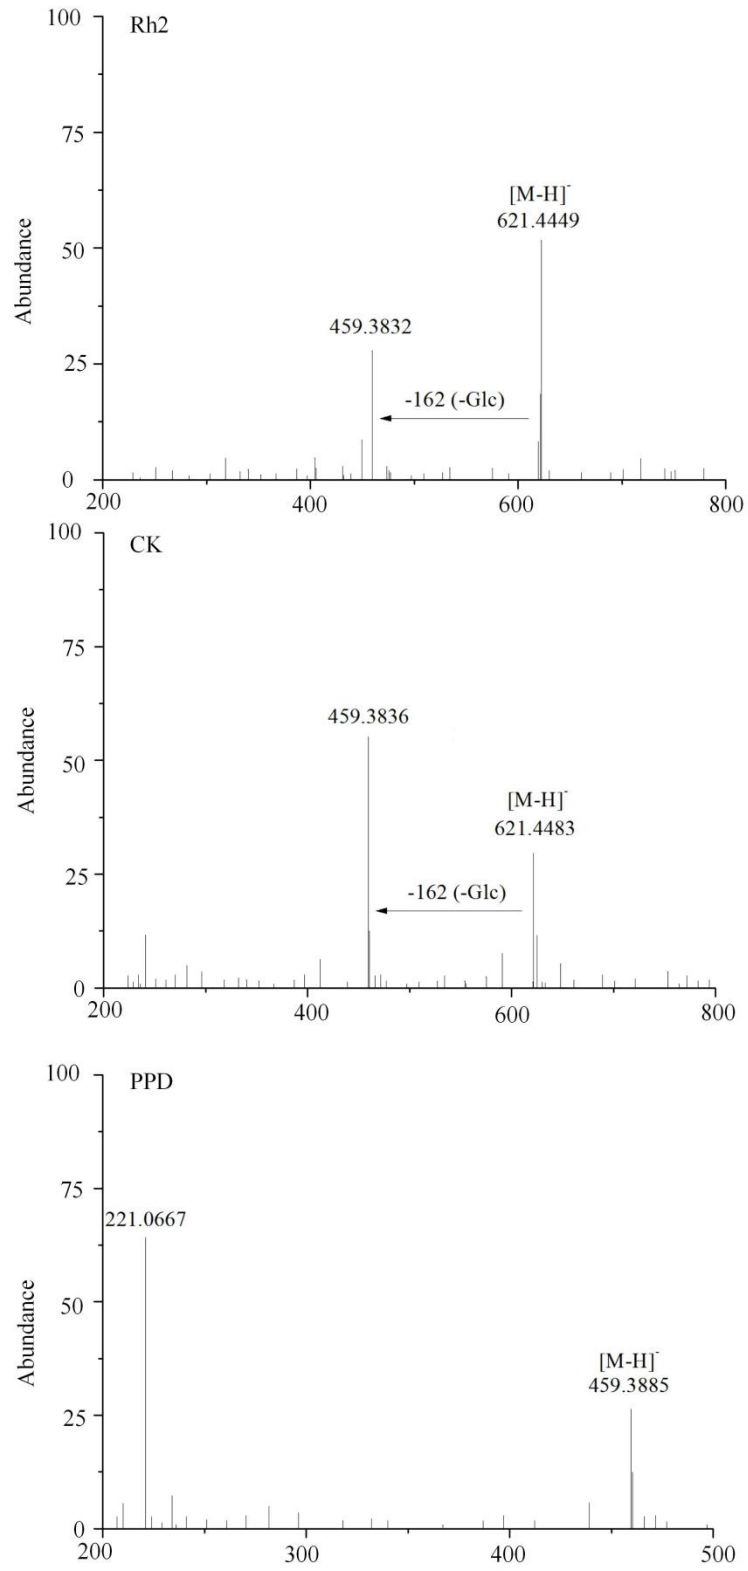

Fig 2
